# Supplementary material for: Deacetylation of α-tubulin and cortactin is required for HDAC6 to trigger ciliary disassembly
Source: PubMed Central journal article supplement (PMC4526867; doi:10.1038/srep12917), 2015-08-06

## Supporting Information

### **Deacetylation of $\alpha$ -tubulin and cortactin is required for HDAC6 to trigger ciliary disassembly**

Jie Ran, Yunfan Yang, Dengwen Li, Min Liu & Jun Zhou\*

**Figure S1. Knockdown of HDAC6 expression does not affect the expression or localization of ciliary regulators.** (A) Western blot analysis of the indicated ciliary regulators, acetylated  $\alpha$ -tubulin,  $\alpha$ -tubulin, and HDAC6 in RPE1 cells transfected with control or HDAC6 siRNAs. (B) Immunofluorescence images of RPE1 cells transfected with control or HDAC6 siRNAs, serum-starved for 24 hours, and stained with antibodies against the indicated ciliary regulators and acetylated  $\alpha$ -tubulin and DAPI. Scale bar, 5  $\mu$ m.

**Figure S2. Overexpression of  $\alpha$ -tubulin decreases the percentage of ciliated cells and ciliary length.** (A) Immunofluorescence images of RPE1 cells transfected with the indicated plasmids, serum-starved for 24 hours, and stained with acetylated  $\alpha$ -tubulin antibody and DAPI. Scale bar, 5  $\mu$ m. (B and C) Experiments were performed as in A, and the percentage of ciliated cells (B) and ciliary length (C) were quantified. \*\*\* $P < 0.001$ ; ns, not significant. Error bars indicate SEM.

Figure S1

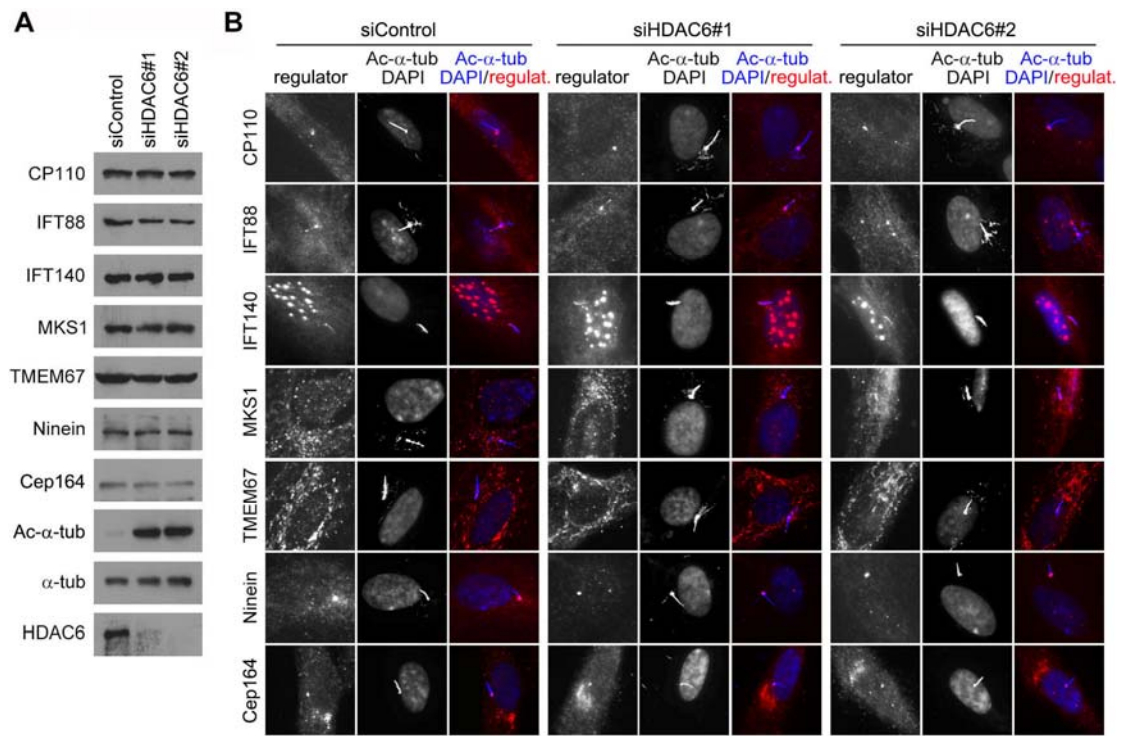

Figure S2

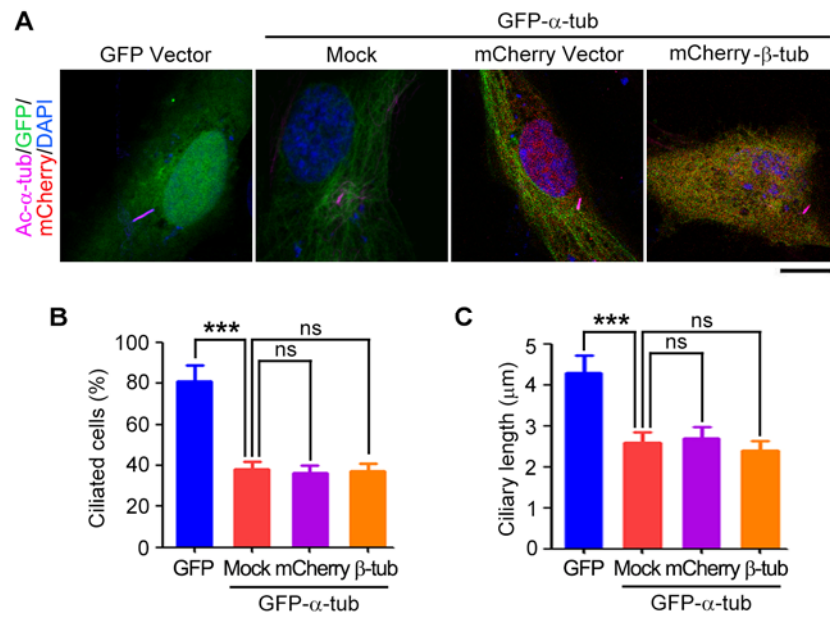

Supplement: srep12917-s1.pdf [file srep12917-s1.pdf]
